# Supplementary material for: Changes in Cystic Fibrosis Airway Microbial Community Associated with a Severe Decline in Lung Function
Source: PubMed Central journal article supplement (PMC4405530; doi:10.1371/journal.pone.0124348), 2015-04-21

Component 2 (14.5%)

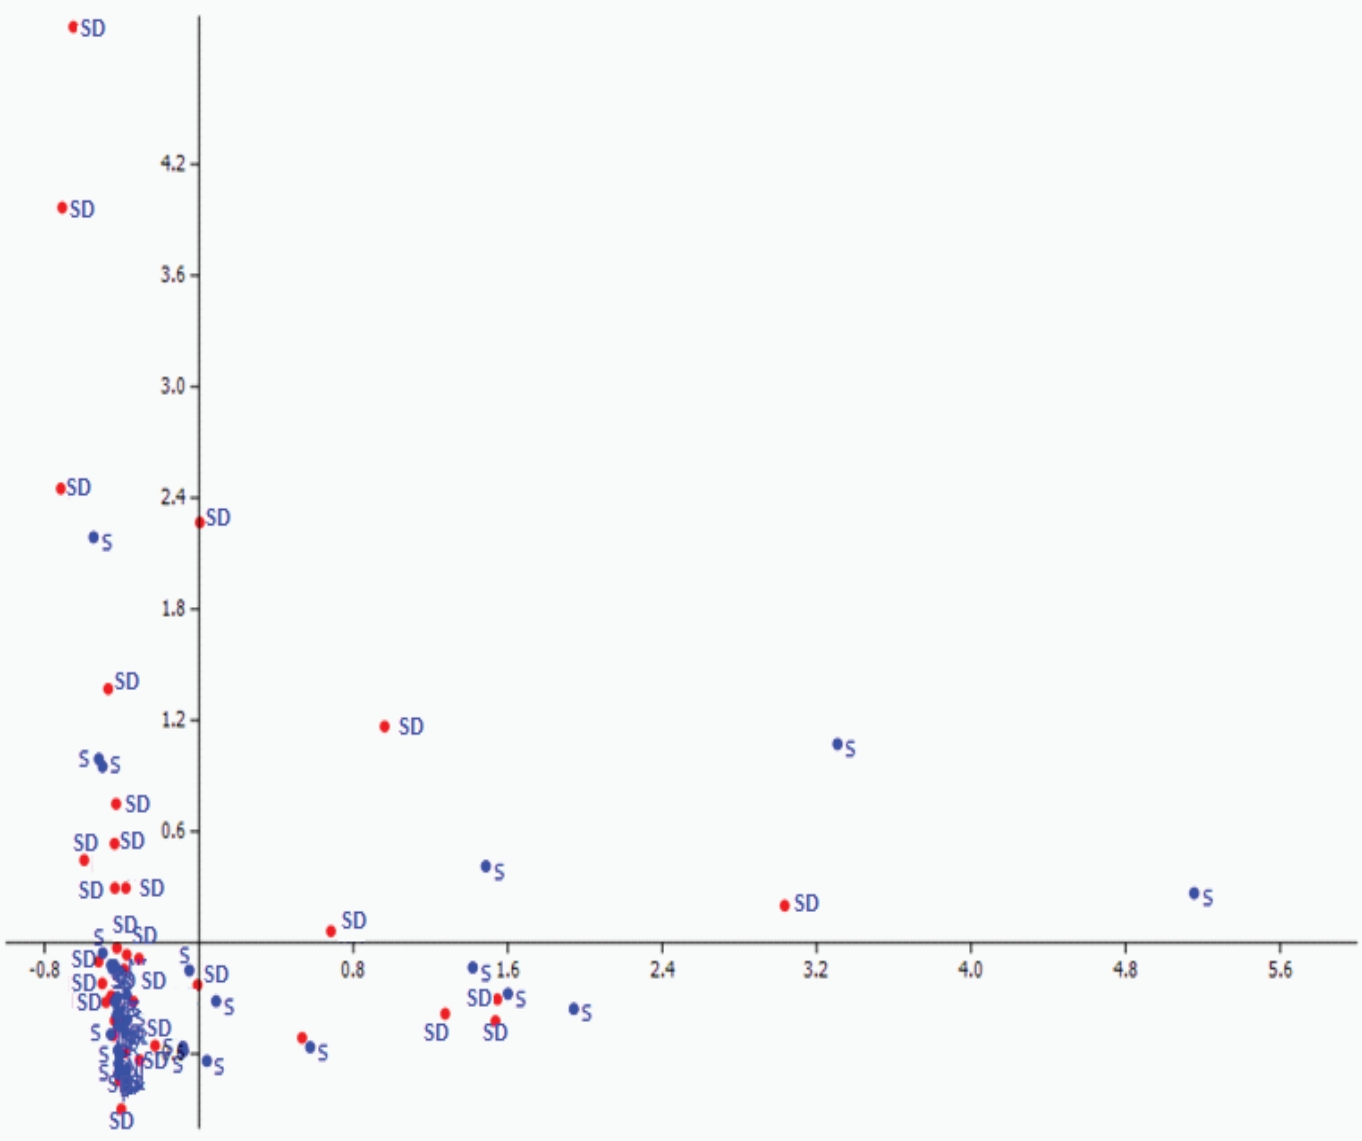

Supplement: pone.0124348.s002.pdf [file pone.0124348.s002.pdf]
