# Supplementary material for: Changes in Cystic Fibrosis Airway Microbial Community Associated with a Severe Decline in Lung Function
Source: PubMed Central journal article supplement (PMC4405530; doi:10.1371/journal.pone.0124348), 2015-04-21
Supplement: pone.0124348.s003.pdf [file pone.0124348.s003.pdf]

**Table S1. Characteristics of the stable cohort at the enrollment in the study.**

| Study ID <sup>a</sup> | Age (years) | Gender | CFTR Genotype     | FEV <sub>1</sub> (%predicted) | BMI  | Microflora                                                                                                                                                                                                                                                 | Maintenance antimicrobial therapy                    |
|-----------------------|-------------|--------|-------------------|-------------------------------|------|------------------------------------------------------------------------------------------------------------------------------------------------------------------------------------------------------------------------------------------------------------|------------------------------------------------------|
| BS1 (I)               | 32          | M      | F508del/N1303K    | 94                            | 23.8 | <i>Pseudomonas aeruginosa</i> ,<br><i>Aspergillus</i> spp.                                                                                                                                                                                                 | aerosolized aztreonam<br>aerosolized colistimethate, |
| BS2 (I)               | 11          | F      | F508del/F508del   | 78                            | 17.0 | <i>P. aeruginosa</i>                                                                                                                                                                                                                                       | aerosolized tobramycin                               |
| BS4 (I)               | 29          | F      | G542X/S549R(A>C)  | 79                            | 21.0 | <i>Staphylococcus aureus</i> ,<br><i>Serratia marcescens</i> ,<br><i>Scedosporium prolificans</i>                                                                                                                                                          | aerosolized colistimethate,<br>azithromycin          |
| BS5 (I)               | 12          | M      | F508del/G91G      | 103                           | 19.5 | <i>S. aureus</i> , <i>Candida albicans</i>                                                                                                                                                                                                                 | none                                                 |
| BS6 (I)               | 17          | F      | F508del/R117H     | 112                           | 22.0 | <i>P. aeruginosa</i> , <i>Prevotella melaninogenica</i> , <i>Veillonella parvula</i> , <i>Neisseria perflava</i> , <i>Neisseria flavescens</i> , <i>Haemophilus parainfluenzae</i> , <i>Streptococcus salivarius</i>                                       | aerosolized tobramycin                               |
| BS7 (I)               | 12          | M      | F508del/G91G      | 103                           | 19.5 | <i>S. aureus</i> , <i>P. melaninogenica</i> , <i>Haemophilus influenzae</i> , <i>N. perflava</i> , <i>Streptococcus</i> spp.                                                                                                                               | none                                                 |
| BS17 (I)              | 28          | F      | F508del/W1282X    | 112                           | 25.0 | <i>P. aeruginosa</i> , <i>Staphylococcus epidermidis</i> , <i>Staphylococcus haemolyticus</i> , <i>Granulicatella adiacens</i> , <i>C. albicans</i>                                                                                                        | aerosolized colistimethate                           |
| BS26 (I)              | 20          | F      | F508del/2789+5G>A | 80                            | 21.1 | <i>Stenotrophomonas maltophilia</i> , <i>Corynebacterium durum</i> , <i>Actinomyces odontolyticus</i> , <i>Capnocytophaga sputigena</i> , <i>H. parainfluenzae</i> , <i>S. parasanguinis</i> , <i>C. albicans</i>                                          | aerosolized colistimethate                           |
| BS29 (I)              | 24          | F      | F508del/L1077P    | 72                            | 23.1 | <i>S. maltophilia</i> , <i>S. aureus</i> , <i>A. odontolyticus</i>                                                                                                                                                                                         | aerosolized tobramycin                               |
| BS32 (I)              | 11          | M      | N1303K/G1244E     | 115                           | 16.0 | <i>S. maltophilia</i> , <i>S. aureus</i> , <i>V. parvula</i> , <i>Veillonella dispar</i> , <i>Veillonella atypica</i> , <i>Prevotella denticola</i> , <i>P. melaninogenica</i> , <i>Lactobacillus</i> spp., <i>S. salivarius</i> , <i>S. parasanguinis</i> | aerosolized tobramycin,<br>azithromycin              |
| BS33 (I)              | 8           | F      | N1303K/G1244E     | 120                           | 21.9 | <i>S. aureus</i> , <i>V. dispar</i> , <i>C.</i>                                                                                                                                                                                                            | aerosolized tobramycin                               |

| Study ID  | Age | Gender | CFTR Genotype       | FEV <sub>1</sub> | BMI  | Microflora                                                                                                                   | Maintenance antimicrobial therapy        |
|-----------|-----|--------|---------------------|------------------|------|------------------------------------------------------------------------------------------------------------------------------|------------------------------------------|
|           |     |        |                     |                  |      | <i>sputigena, Rothia aeria, Streptococcus pneumoniae, Streptococcus sanguinis, N. perflava</i>                               |                                          |
| GS1 (I)   | 13  | M      | R1162X/UK           | 100              | 20.1 | <i>S. aureus, Propionibacterium acnes, Gemella haemolysans, C. albicans</i>                                                  | aerosolized colistimethate, azithromycin |
| GS2 (I)   | 44  | F      | F508del/R334W       | 72               | 20.7 | <i>P. aeruginosa, S. aureus, A. odontolyticus, V. atypica, G. haemolysans, Streptococcus oralis</i>                          | none                                     |
| GS3 (I)   | 30  | F      | F508del/F508del     | 87               | 21.0 | <i>S. aureus, Achromobacter xylosoxydans, P. denticola, S. oralis, Streptococcus pseudopneumoniae, Streptococcus peroris</i> | none                                     |
| GS4 (I)   | 40  | F      | F508del/F508del     | 84               | 19.2 | <i>P. aeruginosa, S. aureus, Enterobacteriaceae, V. atypica, C. albicans</i>                                                 | aerosolized colistimethate, azithromycin |
| GS16 (I)  | 38  | M      | F508del/F508del     | 81               | 22.2 | <i>S. aureus, Prevotella nanceiensis, A. odontolyticus, C. albicans, Aspergillus fumigatus</i>                               | aerosolized tobramycin                   |
| MS1 (I)   | 30  | F      | G1244 E/G1244 E     | 83               | 22.9 | <i>P. aeruginosa, S. aureus, P. acnes, S. oralis, S. pseudopneumoniae, S. peroris</i>                                        | aerosolized colistimethate               |
| BS8 (II)  | 19  | M      | W1282X/621+IG>T     | 43               | 15.3 | <i>A. xylosoxidans, Fusobacterium necrophorum</i>                                                                            | aerosolized tobramycin                   |
| BS21 (II) | 30  | M      | N1303K/M1V          | 68               | 23.8 | <i>P. aeruginosa, S. epidermidis, P. denticola, Rothia dentocariosa, S. pseudopneumoniae</i>                                 | aerosolized colistimethate, azithromycin |
| BS24 (II) | 26  | F      | N1303K/3849+10kbC>T | 50               | 19.8 | <i>P. aeruginosa, S. epidermidis, V. parvula, S. peroris, S. sanguinis</i>                                                   | aerosolized colistimethate, azithromycin |
| BS30 (II) | 25  | M      | F508del/UN          | 43               | 18.1 | <i>P. aeruginosa, S. epidermidis, R. dentocariosa, A. odontolyticus, S.</i>                                                  | aerosolized colistimethate               |

| Study ID   | Age | Gender | CFTR Genotype          | FEV <sub>1</sub> | BMI  | Microflora                                                                                                                                                                                                                        | Maintenance antimicrobial therapy                                |
|------------|-----|--------|------------------------|------------------|------|-----------------------------------------------------------------------------------------------------------------------------------------------------------------------------------------------------------------------------------|------------------------------------------------------------------|
| GS10 (II)  | 50  | M      | F508del/ F508del       | 57               | 19.2 | <i>pseudopneumoniae</i><br><i>Staphylococcus</i> coagulase negative, <i>Streptococcus viridans</i> , <i>P. aeruginosa</i> , <i>A. odontolyticus</i> , <i>Bifidobacterium longum</i> , <i>G. haemolysans</i> , <i>A. fumigatus</i> | aerosolized colistimethate, aerosolized tobramycin, azithromycin |
| GS11 (II)  | 24  | M      | F508del/N1303K         | 42               | 24.4 | <i>P. melaninogenica</i> , <i>Gemella sanguinis</i> , <i>S. parasanguinis</i> , <i>S. salivarius</i> , <i>P. denticola</i>                                                                                                        | azithromycin                                                     |
| GS20 (II)  | 20  | F      | 3849+10KbC>T/2118DEL4  | 67               | 19.7 | <i>S. aureus</i> , <i>S. viridans</i> , <i>P. nanceiensis</i> , <i>P. melaninogenica</i>                                                                                                                                          | aerosolized tobramycin, azithromycin                             |
| GS21 (II)  | 42  | M      | F508del/F508del        | 55               | 22.5 | <i>S. aureus</i> , <i>S. viridans</i> , <i>Prevotella oris</i> , <i>P. nanceiensis</i> , <i>P. nigrescens</i> , <i>C. albicans</i>                                                                                                | none                                                             |
| MS3 (II)   | 25  | F      | F508del/G178R          | 56               | 21.4 | <i>P. aeruginosa</i> , <i>S. aureus</i> , <i>Pseudomonas</i> spp, <i>Prevotella pallens</i> , <i>P. melaninogenica</i> , <i>S. parasanguinis</i> , <i>S. oralis</i>                                                               | aerosolized tobramycin,                                          |
| MS4 (II)   | 42  | M      | F508del/3199del6/1148T | 47               | 23.1 | <i>S. aureus</i> , <i>P. aeruginosa</i> , <i>V. parvula</i>                                                                                                                                                                       | aerosolized colistimethate                                       |
| MS5 (II)   | 30  | M      | F508del/F508del        | 43               | 20.7 | <i>P. aeruginosa</i> , <i>V. parvula</i> , <i>P. salivae</i> , <i>S. peroris</i> , <i>Streptococcus infantis</i>                                                                                                                  | aerosolized tobramycin, azithromycin                             |
| MS6 (II)   | 54  | M      | 2789+5G >A/2789+5G >A  | 52               | 26.7 | <i>P. aeruginosa</i> , <i>Abiotrophia defectiva</i>                                                                                                                                                                               | azithromycin                                                     |
| MS7 (II)   | 52  | M      | 2789+5G>A/1602delICT   | 55               | 24.3 | <i>P. aeruginosa</i> , <i>A. odontolyticus</i> , <i>Lactobacillus gasseri</i> , <i>A. fumigatus</i>                                                                                                                               | azithromycin                                                     |
| MS14 (II)  | 11  | F      | F508del/G85Ee          | 44               | 15.4 | <i>P. aeruginosa</i> , <i>S. aureus</i>                                                                                                                                                                                           | aerosolized tobramycin, azithromycin                             |
| BS3 (III)  | 26  | F      | F508del/F508del        | 29               | 22.0 | <i>Burkholderia cepacia</i> complex, <i>S. aureus</i>                                                                                                                                                                             | aerosolized colistimethate, aerosolized tobramycin, azithromycin |
| BS19 (III) | 35  | M      | F508del/W1282X         | 37               | 24.9 | <i>S. aureus</i> , <i>P. denticola</i> , <i>S. oralis</i> , <i>S. sanguinis</i> , <i>H.</i>                                                                                                                                       | aerosolized colistimethate, azithromycin                         |

| Study ID   | Age | Gender | CFTR Genotype     | FEV <sub>1</sub> | BMI  | Microflora                                                                                                                                                                                                                                      | Maintenance antimicrobial therapy                                |
|------------|-----|--------|-------------------|------------------|------|-------------------------------------------------------------------------------------------------------------------------------------------------------------------------------------------------------------------------------------------------|------------------------------------------------------------------|
|            |     |        |                   |                  |      | <i>parainfluenzae, Candida parapsilosis, C. albicans, A. fumigatus</i>                                                                                                                                                                          |                                                                  |
| BS25 (III) | 29  | F      | F508del/G551D     | 39               | 25.5 | <i>B. cepacia complex, S. aureus, S. marcescens, R. mucilaginosa, G. sanguinis, G. bergeri, N. mucosa, H. parainfluenzae, H. influenzae, S. oralis</i>                                                                                          | none                                                             |
| BS39 (III) | 21  | M      | F508del/F508del   | 28               | 20.5 | <i>S. aureus, A. xylosoxidans, S. epidermidis, Haemophilus parahaemolyticus, S. sanguinis, Streptococcus constellatus, S. pseudopneumoniae, Neisseria subflava, R. dentocariosa, R. mucilaginosa, C. sputigena, G. haemolysans, C. albicans</i> | aerosolized colistimethate, aerosolized tobramycin, azithromycin |
| BS51 (III) | 36  | M      | 2789+5G>A/F508del | 38               | 21.0 | <i>A. xylosoxidans, P. aeruginosa, S. epidermidis, N. mucosa, A. odontolyticus, C. albicans</i>                                                                                                                                                 | aerosolized colistimethate, azithromycin                         |
| BS71 (III) | 18  | F      | F508del/F508del   | 23               | 18.0 | <i>P. aeruginosa, S. aureus, C. albicans</i>                                                                                                                                                                                                    | aerosolized colistimethate, azithromycin                         |
| BS85 (III) | 34  | M      | F508del/1259insA  | 21               | 18.8 | <i>P. aeruginosa, Enterococcus faecalis, C. albicans, Aspergillus flavus, A. fumigatus</i>                                                                                                                                                      | aerosolized colistimethate, azithromycin                         |
| GS14 (III) | 26  | M      | F508del/G85E      | 37               | 22.1 | <i>S. aureus, A. xylosoxydans</i>                                                                                                                                                                                                               | aerosolized colistimethate, azithromycin                         |
| MS10 (III) | 29  | M      | F508del/F508del   | 25               | 24.3 | <i>P. aeruginosa, S. maltophilia, V. parvula, S. pneumoniae, S. peroris</i>                                                                                                                                                                     | aerosolized colistimethate, azithromycin                         |

<sup>a</sup>In parenthesis, the FEV<sub>1</sub> group: I = normal/mild (FEV<sub>1</sub>% > 70); II = moderate (70 ≥ FEV<sub>1</sub>% ≥ 40); III = severe (FEV<sub>1</sub>% < 40).
