# Supplementary material for: Changes in Cystic Fibrosis Airway Microbial Community Associated with a Severe Decline in Lung Function
Source: PubMed Central journal article supplement (PMC4405530; doi:10.1371/journal.pone.0124348), 2015-04-21
Supplement: pone.0124348.s004.pdf [file pone.0124348.s004.pdf]

**Table S2. Characteristics of the substantial decliners' cohort at the enrollment in the study.**

| Study ID <sup>a</sup> | Age (years) | Gender | CFTR Genotype     | FEV <sub>1</sub> (%predicted) | BMI  | Microflora                                                                                                                                                                                                                                                                  | Maintenance antimicrobial therapy                                      |
|-----------------------|-------------|--------|-------------------|-------------------------------|------|-----------------------------------------------------------------------------------------------------------------------------------------------------------------------------------------------------------------------------------------------------------------------------|------------------------------------------------------------------------|
| BSD9 (I)              | 23          | F      | F508del/1717-1G>A | 84                            | 21.0 | <i>Mycobacterium abscessus</i> ,<br><i>Veillonella atypica</i> , <i>Prevotella salivae</i> , <i>Pseudallescheria boydii</i>                                                                                                                                                 | aerosolized colistimethate,<br>aerosolized tobramycin                  |
| BSD10 (I)             | 23          | F      | F508del/1717-1G>A | 84                            | 21.0 | <i>M. abscessus</i> , <i>Prevotella melaninogenica</i> , <i>P. boydii</i>                                                                                                                                                                                                   | aerosolized colistimethate<br>aerosolized tobramycin                   |
| BSD13 (I)             | 29          | M      | F508del/G542X     | 71                            | 22.0 | <i>Pseudomonas aeruginosa</i> ,<br><i>Veillonella dispar</i> , <i>Candida albicans</i>                                                                                                                                                                                      | aerosolized tobramycin                                                 |
| BSD22 (I)             | 21          | F      | F508del/G85E      | 81                            | 22.1 | <i>Staphylococcus aureus</i> , <i>Rothia mucilaginosa</i> , <i>Prevotella denticola</i> , <i>Neisseria perflava</i> ,<br><i>Neisseria macacae</i> , <i>Neisseria mucosa</i> , <i>Haemophilus parainfluenzae</i> , <i>Streptococcus salivarius</i> , <i>Candida glabrata</i> | aerosolized tobramycin,<br>azithromycin                                |
| BSD28 (I)             | 20          | M      | F508del/F508del   | 75                            | 23.0 | <i>S. aureus</i> , <i>Streptococcus viridans</i> , <i>Bacillus licheniformis</i> ,<br><i>Neosartoria pseudofischeri</i>                                                                                                                                                     | aerosolized colistimethate,<br>aerosolized tobramycin,<br>azithromycin |
| GSD5 (I)              | 24          | M      | F508del/12491G>A  | 72                            | 22.7 | <i>Pseudomonas</i> spp., <i>S. aureus</i> ,<br><i>S. viridians</i> , <i>Prevotella intermedia</i> , <i>Streptococcus pneumoniae</i>                                                                                                                                         | none                                                                   |
| GSD6 (I)              | 17          | F      | F508del/F508del   | 91                            | 20.2 | <i>S. aureus</i> , <i>Prevotella nanceiensis</i> , <i>Streptococcus peroris</i> , <i>Streptococcus pseudopneumoniae</i> ,<br><i>S. pneumoniae</i> , <i>Aspergillus fumigatus</i>                                                                                            | none                                                                   |
| GSD7 (I)              | 37          | F      | G542X/D1152H      | 78                            | 19.4 | <i>S. viridans</i> , <i>Stenotrophomonas maltophilia</i> , <i>P. nanceiensis</i> ,<br><i>S. pseudopneumoniae</i> ,<br><i>Streptococcus oralis</i> ,<br><i>Granulicatella elegans</i> ,<br><i>Prevotella nigrescens</i>                                                      | none                                                                   |

| Study ID   | Age | Gender | CFTR Genotype          | FEV <sub>1</sub> | BMI  | Microflora                                                                                                                                                                                                          | Maintenance antimicrobial therapy                                      |
|------------|-----|--------|------------------------|------------------|------|---------------------------------------------------------------------------------------------------------------------------------------------------------------------------------------------------------------------|------------------------------------------------------------------------|
|            |     |        |                        |                  |      | <i>Actinomyces graevenitzii</i> ,<br><i>S. pneumoniae</i>                                                                                                                                                           |                                                                        |
| GSD8 (I)   | 13  | F      | F508del/E585X          | 74               | 18.2 | <i>S. maltophilia</i> , <i>P. aeruginosa</i> ,<br><i>S. viridans</i> , <i>S. aureus</i> ,<br><i>P. nanceiensis</i> , <i>G. sanguinis</i>                                                                            | none                                                                   |
| GSD9 (I)   | 10  | F      | 2183AA>G/I148-3199DEL6 | 77               | 17.9 | <i>P. aeruginosa</i> , <i>S. aureus</i> ,<br><i>Actinomyces odontolyticus</i>                                                                                                                                       | aerosolized colistimethate,<br>azithromycin                            |
| GSD17 (I)  | 18  | M      | F508del/F508del        | 85               | 20.7 | <i>S. aureus</i> , <i>Ralstonia</i> spp.,<br><i>Delftia acidovorans</i> , <i>P.</i><br><i>nanceiensis</i> , <i>Capnocytophaga</i><br><i>ochracea</i> , <i>C. albicans</i>                                           | none                                                                   |
| MSD2 (I)   | 28  | F      | N1303K/L1065P          | 75               | 21.5 | <i>P. aeruginosa</i> , <i>S. aureus</i> ,<br><i>Lactobacillus suebicus</i> ,<br><i>P. nigrescens</i> , <i>S. oralis</i> ,<br><i>P. pseudopneumoniae</i> ,<br><i>A. fumigatus</i>                                    | aerosolized tobramycin,<br>azithromycin                                |
| MSD8 (I)   | 16  | M      | F508del/N1303K         | 75               | 19.8 | <i>S. aureus</i> , <i>A. fumigatus</i>                                                                                                                                                                              | aerosolized aztreonam                                                  |
| BSD11 (II) | 24  | F      | G542X/UN               | 60               | 21.6 | <i>P. aeruginosa</i> , <i>S. aureus</i> ,<br><i>P. melaninogenica</i> , <i>S. salivarius</i>                                                                                                                        | aerosolized colistimethate,<br>aerosolized tobramycin,<br>azithromycin |
| BSD12 (II) | 17  | F      | G542X/W1282R           | 49               | 17.9 | <i>P. aeruginosa</i> , <i>R. mucilaginosa</i> ,<br><i>P. denticola</i> , <i>S. oralis</i> ,<br><i>C. albicans</i>                                                                                                   | aerosolized tobramycin,<br>azithromycin                                |
| BSD14 (II) | 18  | F      | F508del/R533X          | 69               | 20.0 | <i>P. aeruginosa</i> , <i>S. aureus</i> ,<br><i>R. mucilaginosa</i> , <i>P. denticola</i> ,<br><i>V. atypica</i> , <i>P. melaninogenica</i> ,<br><i>Neisseria flava</i> ,<br><i>N. macacae</i> , <i>C. albicans</i> | aerosolized colistimethate                                             |
| BSD16 (II) | 28  | F      | F508del/4016insT       | 53               | 19.1 | <i>P. aeruginosa</i> , <i>R. mucilaginosa</i> ,<br><i>Actinomyces</i> spp., <i>S. peroris</i> ,<br><i>C. albicans</i>                                                                                               | aerosolized aztreonam,<br>aerosolized colistimethate                   |
| BSD18 (II) | 18  | F      | G542X/N1303K           | 54               | 20.8 | <i>S. aureus</i> , <i>R. mucilaginosa</i> ,<br><i>Rothia aerea</i> , <i>H. parainfluenzae</i> ,<br><i>S. oralis</i> ,<br><i>S. pseudopneumoniae</i>                                                                 | aerosolized tobramycin                                                 |
| BSD23 (II) | 16  | M      | F508del/G542X          | 53               | 16.0 | <i>P. aeruginosa</i>                                                                                                                                                                                                | aerosolized tobramycin                                                 |

| Study ID    | Age | Gender | CFTR Genotype       | FEV <sub>1</sub> | BMI  | Microflora                                                                                                                                                                                                                                                                                                             | Maintenance antimicrobial therapy                     |
|-------------|-----|--------|---------------------|------------------|------|------------------------------------------------------------------------------------------------------------------------------------------------------------------------------------------------------------------------------------------------------------------------------------------------------------------------|-------------------------------------------------------|
| GSD12 (II)  | 59  | F      | F508del/F508del     | 44               | 21.9 | <i>S. pseudopneumoniae</i> ,<br><i>C. albicans</i><br><i>S. viridans</i> , <i>S. aureus</i> ,<br>Enterobacteriaceae,<br><i>P. aeruginosa</i>                                                                                                                                                                           | azithromycin                                          |
| GSD13 (II)  | 20  | F      | F508del/F508del     | 67               | 20.7 | <i>S. aureus</i> , <i>P. melaninogenica</i> ,<br><i>S. pneumoniae</i> , <i>C. albicans</i>                                                                                                                                                                                                                             | azithromycin                                          |
| GSD22 (II)  | 30  | M      | DEL2,3(21KB)/L1077P | 46               | 18.5 | <i>P. aeruginosa</i> , <i>Staphylococcus</i><br>coagulase negative,<br><i>P. melaninogenica</i>                                                                                                                                                                                                                        | aerosolized tobramycin,<br>azithromycin               |
| GSD23 (II)  | 25  | F      | F508del/F508del     | 42               | 17.4 | <i>P. aeruginosa</i> , <i>Escherichia coli</i>                                                                                                                                                                                                                                                                         | azithromycin                                          |
| GSD24 (II)  | 48  | F      | F508del/F508del     | 35               | 17.3 | <i>S. aureus</i> , <i>P. aeruginosa</i> ,<br><i>S. viridans</i> , <i>P. denticola</i> ,<br><i>S. pneumoniae</i>                                                                                                                                                                                                        | aerosolized colistimethate,<br>azithromycin           |
| GSD25 (II)  | 32  | M      | F508del/G542X       | 37               | 21.5 | <i>S. aureus</i> , <i>P. aeruginosa</i> ,<br><i>S. viridans</i> , <i>Prevotella pallens</i> ,<br><i>A. odontolyticus</i> , <i>Atopobium rimae</i>                                                                                                                                                                      | aerosolized colistimethate,<br>azithromycin           |
| MSD9 (II)   | 12  | F      | F508del/F508del     | 53               | 19.3 | <i>S. aureus</i> , <i>S. maltophilia</i> ,<br><i>Granulicatella adiacens</i>                                                                                                                                                                                                                                           | aerosolized aztreonam,<br>aerosolized tobramycin      |
| BSD15 (III) | 46  | F      | F508del/UN          | 37               | 19.7 | <i>P. aeruginosa</i> , <i>S. aureus</i> ,<br><i>C. albicans</i> , <i>C. dubliniensis</i>                                                                                                                                                                                                                               | aerosolized colistimethate,<br>azithromycin           |
| BSD20 (III) | 24  | M      | F508del/F508del     | 36               | 23.3 | <i>P. aeruginosa</i> , <i>Enterococcus</i><br><i>faecalis</i> , <i>S. maltophilia</i> ,<br><i>Staphylococcus epidermidis</i> ,<br><i>R. mucilaginosa</i> , <i>P. salivae</i> ,<br><i>Veillonella parvula</i> ,<br><i>S. pseudopneumoniae</i> ,<br><i>C. parapsilosis</i> , <i>C. albicans</i> ,<br><i>A. fumigatus</i> | aerosolized aztreonam,<br>aerosolized colistimethate  |
| BSD37 (III) | 24  | F      | F508del/UN          | 39               | 20.5 | <i>Achromobacter xylosoxidans</i> ,<br><i>Corynebacterium amicolatum</i> ,<br><i>R. mucilaginosa</i> , <i>Rothia</i><br><i>dentocariosa</i> , <i>V. parvula</i> ,<br><i>P. denticola</i> , <i>S. salivarius</i> ,<br><i>S. pseudopneumoniae</i> ,<br><i>Scedosporium prolificans</i>                                   | aerosolized colistimethate,<br>aerosolized tobramycin |

| Study ID    | Age | Gender | CFTR Genotype                                 | FEV <sub>1</sub> | BMI  | Microflora                                                                                                                                                                                                                                                         | Maintenance antimicrobial therapy           |
|-------------|-----|--------|-----------------------------------------------|------------------|------|--------------------------------------------------------------------------------------------------------------------------------------------------------------------------------------------------------------------------------------------------------------------|---------------------------------------------|
| BSD38 (III) | 18  | M      | N1303K/F508del                                | 35               | 16.6 | <i>A. xylosoxidans</i> , <i>P. aeruginosa</i> ,<br><i>V. dispar</i> , <i>Bifidobacterium breve</i><br><i>R. mucillaginosa</i> ,<br><i>Streptococcus gordonii</i> , <i>S.</i><br><i>pseudopneumoniae</i> , <i>S. peroris</i> ,<br><i>Streptococcus constellatus</i> | aerosolized tobramycin                      |
| BSD49 (III) | 26  | M      | N1303K/G85E                                   | 29               | 19.9 | <i>Burkholderia cepacia</i> complex,<br><i>P. aeruginosa</i> , <i>P. denticola</i> ,<br><i>P. melaninogenica</i> ,<br><i>Bifidobacterium dentum</i> ,<br><i>Lactobacillus gasseri</i> ,<br><i>Peptoniphilus haeri</i>                                              | aerosolized colistimethate                  |
| GSD15 (III) | 29  | M      | F508del/F508del                               | 36               | 27.1 | <i>S. aureus</i> , <i>P. aeruginosa</i> ,<br><i>A. xylosoxydans</i> , <i>Cryseobacterium</i><br>spp.                                                                                                                                                               | aerosolized colistimethate,<br>azithromycin |
| GSD26 (III) | 45  | M      | F508del/H939R+H949L                           | 28               | 19.2 | <i>P. aeruginosa</i> ,<br><i>P. melaninogenica</i> , <i>Parvimonas</i><br><i>micra</i> , <i>Campylobacter concisus</i> ,<br><i>A. odontolyticus</i>                                                                                                                | aerosolized colistimethate                  |
| GSD27 (III) | 25  | M      | F508del/F508del                               | 29               | 22.5 | <i>S. aureus</i> , <i>P. aeruginosa</i> ,<br><i>A. xylosoxidans</i> , <i>Streptococcus</i><br>spp., <i>S. oralis</i> ,<br><i>S. salivarius</i> , <i>B. breve</i>                                                                                                   | none                                        |
| MSD11 (III) | 31  | M      | 4169delCTAAGCC/E585X                          | 33               | 11.4 | <i>A. xylosoxidans</i> ,<br><i>S. pneumoniae</i> , <i>S. peroris</i>                                                                                                                                                                                               | aerosolized tobramycin,<br>azithromycin     |
| MSD12 (III) | 37  | F      | F508del/del Exon 2                            | 32               | 25.9 | <i>P. aeruginosa</i> , <i>S. pneumoniae</i>                                                                                                                                                                                                                        | aerosolized colistimethate,<br>azithromycin |
| MSD13 (III) | 18  | M      | 1898+1G>A/1898+1G>A                           | 33               | 16.3 | <i>P. aeruginosa</i> , <i>S. aureus</i>                                                                                                                                                                                                                            | azithromycin                                |
| MSD15 (III) | 49  | M      | G1244E/del Exons 14a,<br>14b,15, 16, 17a, 17b | 32               | 15.4 | <i>P. aeruginosa</i> , <i>S. aureus</i> ,<br><i>C. albicans</i>                                                                                                                                                                                                    | azithromycin                                |

<sup>a</sup>In parenthesis, the FEV<sub>1</sub> group: I = normal/mild (FEV<sub>1</sub>% > 70); II = moderate (70 ≥ FEV<sub>1</sub>% ≥ 40); III = severe (FEV<sub>1</sub>% < 40)
